# Supplementary material
Source: PubMed Central journal article supplement (PMC5526462)
Supplement: NIHMS875286-supplement-Supplemental_Information.pdf [file NIHMS875286-supplement-Supplemental_Information.pdf]

**NMR structure and binding studies of PqqD, a chaperone required in the biosynthesis of the bacterial dehydrogenase cofactor pyrroloquinoline quinone**

*Robert L. Evans III<sup>1</sup>, John A. Latham<sup>2</sup>, Youlin Xia<sup>3</sup>, Judith P. Klinman<sup>4</sup>, Carrie M. Wilmot<sup>1,\*</sup>*

\*Corresponding author (E-mail: wilmo004@umn.edu)

<sup>1</sup> Department of Biochemistry, Molecular Biology, and Biophysics, University of Minnesota, Twin Cities, 1479 Gortner Ave., Suite 140, Saint Paul, MN, 55108 USA

<sup>2</sup> Department of Chemistry, University of California, Berkeley, Berkeley, CA, 94720 USA

Current address: Department of Chemistry and Biochemistry, University of Denver, Denver, CO, 80208 USA

<sup>3</sup> Minnesota NMR Center, University of Minnesota, Twin Cities, Minneapolis, MN, 55455 USA

<sup>4</sup> Departments of Chemistry and of Molecular and Cell Biology, University of California, Berkeley, Berkeley, CA, 94720 USA

**CONTENTS:**

Figure S1 – Sequence alignment of PqqDs

Figure S2 – Relationship between MePqqD and the crystal structure of XcPqqD

Figure S3 – TALOS+ and CSI2.0 plots (order and flexibility, respectively) for MePqqD

Figure S4 – Sequence alignments to identify linker in the natural MePqqCD fusion

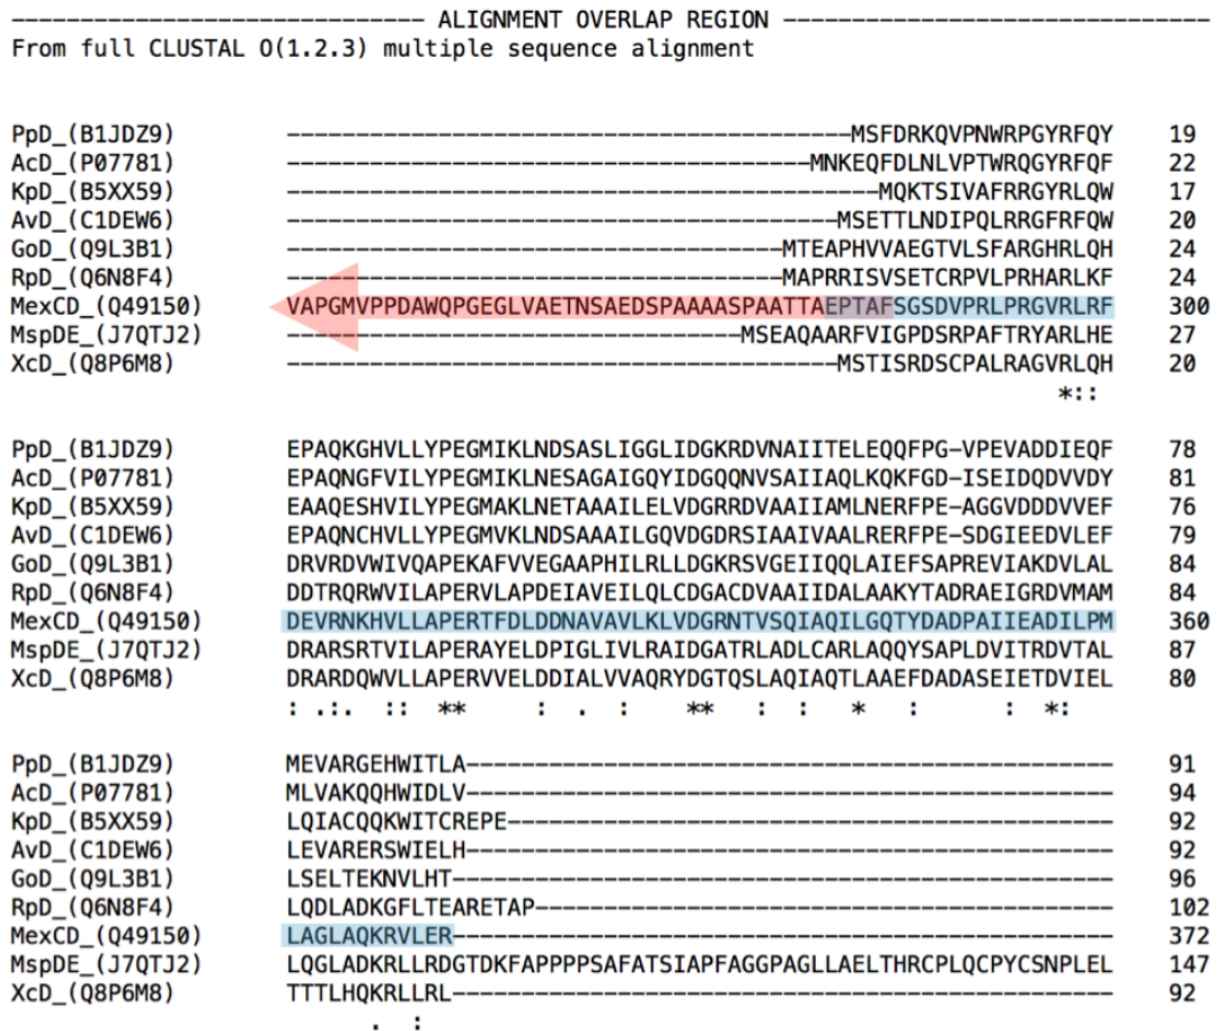

**Figure S1.** The PqqD portion of MePqqCD was identified using an alignment of nine species, two of which were natural fusions. ‘MexCD\_(Q49150)’ represents MePqqCD. The pink/purple arrow identifies the linker region and PqqC enzyme portion of the fusion, and the purple/blue, PqqD. The Uniprot identifiers are enclosed in parentheses and the alignment was completed using Clustal Omega (<http://www.uniprot.org/> and <http://www.ebi.ac.uk/Tools/msa/clustalo/>, respectively).

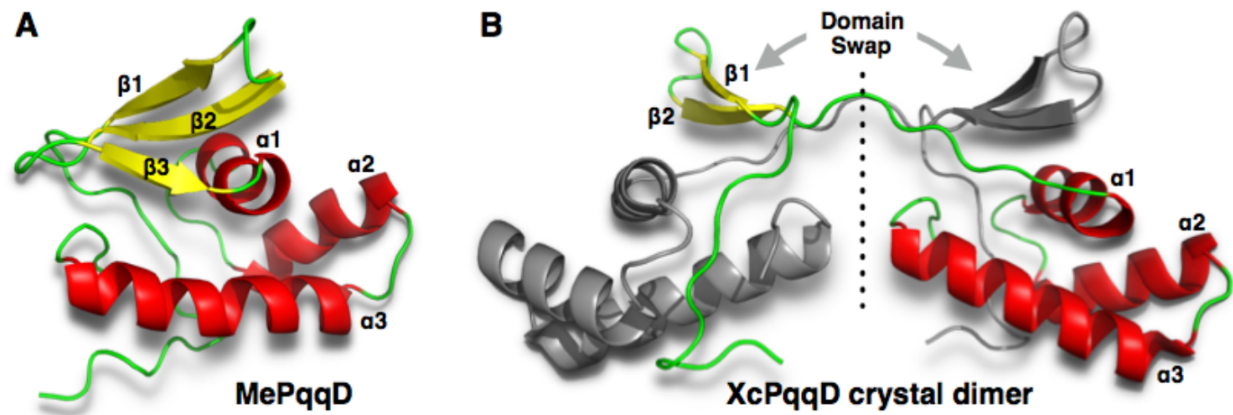

**Figure S2.** The PqqD structure. (A) The MePqqD monomeric NMR solution structure. (B) The XcPqqD dimeric crystal structure showing that the domain swapped  $\beta$ -hairpins occupy a similar position in the MePqqD monomer.

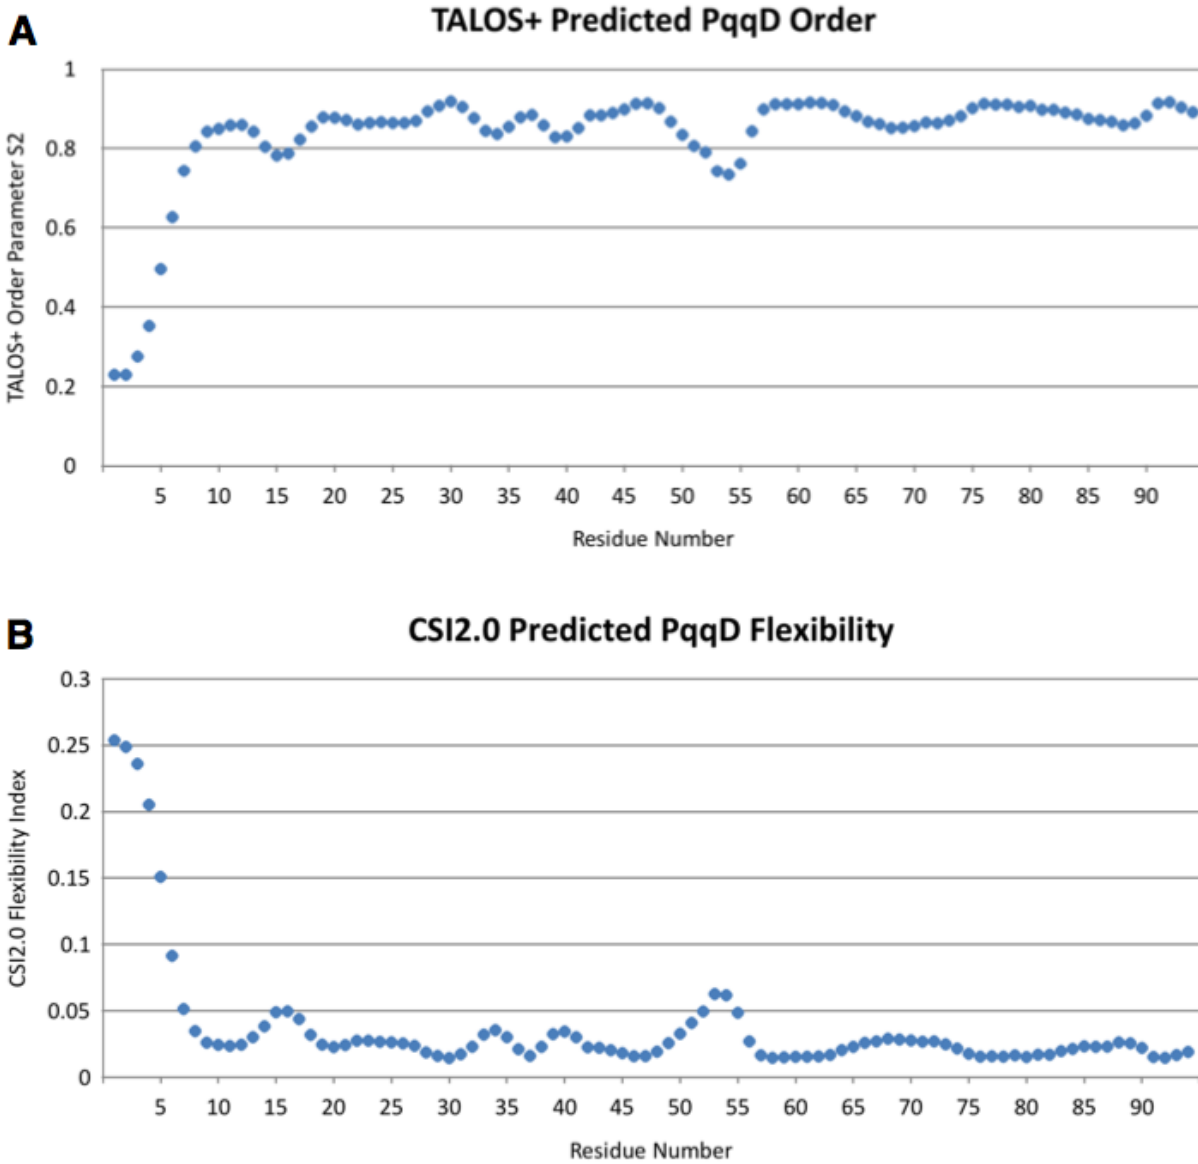

**Figure S3.** Structural order and flexibility by residue number as predicted by TALOS+ (A) and CSI2.0 (B).
